# Supplementary material
Source: PubMed Central journal article supplement (PMC9069070)
Supplement: mmc1.pdf [file mmc1.pdf]

## Supplemental information

### Germline variants in tumor suppressor *FBXW7*

### lead to impaired ubiquitination

### and a neurodevelopmental syndrome

Sarah E.M. Stephenson, Gregory Costain, Laura E.R. Blok, Michael A. Silk, Thanh Binh Nguyen, Xiaomin Dong, Dana E. Alhuzaimi, James J. Dowling, Susan Walker, Kimberly Amburgey, Robin Z. Hayeems, Lance H. Rodan, Marc A. Schwartz, Jonathan Picker, Sally A. Lynch, Aditi Gupta, Kristen J. Rasmussen, Lisa A. Schimmenti, Eric W. Klee, Zhiyv Niu, Katherine E. Agre, Ilana Chilton, Wendy K. Chung, Anya Revah-Politi, P.Y. Billie Au, Christopher Griffith, Melissa Racobaldo, Annick Raas-Rothschild, Bruria Ben Zeev, Ortal Barel, Sebastien Moutton, Fanny Morice-Picard, Virginie Carmignac, Jenny Cornaton, Nathalie Marle, Orrin Devinsky, Chandler Stimach, Stephanie Burns Wechsler, Bryan E. Hainline, Katie Sapp, Marjolaine Willems, Ange-line Bruel, Kerith-Rae Dias, Carey-Anne Evans, Tony Roscioli, Rani Sachdev, Suzanna E.L. Temple, Ying Zhu, Joshua J. Baker, Ingrid E. Scheffer, Fiona J. Gardiner, Amy L. Schneider, Alison M. Muir, Heather C. Mefford, Amy Crunk, Elizabeth M. Heise, Francisca Millan, Kristin G. Monaghan, Richard Person, Lindsay Rhodes, Sarah Richards, Ingrid M. Wentzensen, Benjamin Cogné, Bertrand Isidor, Mathilde Nizon, Marie Vincent, Thomas Besnard, Amelie Piton, Carlo Marcelis, Kohji Kato, Norihisa Koyama, Tomoo Ogi, Elaine Suk-Ying Goh, Christopher Richmond, David J. Amor, Jessica O. Boyce, Angela T. Morgan, Michael S. Hildebrand, Antony Kaspi, Melanie Bahlo, Rún Friðriksdóttir, Hildigunnur Katrínardóttir, Patrick Sulem, Kári Stefánsson, Hans Tómas Björnsson, Simone Mandelstam, Manuela Morleo, Milena Mariani, TUDP Study Group, Marcello Scala, Andrea Accogli, Annalaura Torella, Valeria Capra, Mathew Wallis, Sandra Jansen, Quinten Waisfisz, Hugoline de Haan, Simon Sadedin, Broad Center for Mendelian Genomics, Sze Chern Lim, Susan M. White, David B. Ascher, Annette Schenck, Paul J. Lockhart, John Christodoulou, and Tiong Yang Tan

## **Acknowledgements**

UDP-Vic acknowledges financial support from the Murdoch Children's Research Institute and the Harbig Foundation. The Rare Disease Flagship acknowledges financial support from the Royal Children's Hospital Foundation, the Murdoch Children's Research Institute, and the Harbig Foundation. The research conducted at the Murdoch Children's Research Institute and Baker Heart and Diabetes Institute was supported by the Victorian Government's Operational Infrastructure Support Program. Sequencing and analysis of Individual 1 were provided by the Broad Institute of MIT and Harvard Center for Mendelian Genomics (Broad CMG) and was funded by the National Human Genome Research Institute, the National Eye Institute, and the National Heart, Lung and Blood Institute grant UM1 HG008900 to Daniel MacArthur and Heidi Rehm.

The research pertaining to Individual 18 was supported by Telethon Undiagnosed Diseases Program (TUDP, GSP15001).

Sequencing of Individual 31 was funded by CREGEMES and Sanger validated by Claire Feger.

The research conducted at The Hospital for Sick Children (Canada) was supported in part by the Norm Saunders Complex Care Initiative, SickKids Centre for Genetic Medicine, and University of Toronto McLaughlin Centre.

The Chair in Genomic Medicine awarded to J.C. is generously supported by The Royal Children's Hospital Foundation.

This work was in part supported by a grant awarded under the Australian National Health & Medical Research Council (NHMRC) Centre for Research Excellence Scheme

(APP1117394) to L.E.R.B., A.S., T.R., K-R.D., C-A.E. and by a personal Vici grant (09150181910022) from The Netherlands Organization for Scientific Research (NWO) to A.S.

Research reported in this publication was supported by the National Cancer Institute of the National Institutes of Health under Award Number T32CA136432. The content is solely the responsibility of the authors and does not necessarily represent the official views of the National Institutes of Health.

D.B.A, T.B.N. and M.S. were supported by an Investigator Grant from the National Health and Medical Research Council (NHMRC) of Australia (GNT1174405).

This publication was supported by the National Center for Advancing Translational Sciences, National Institutes of Health, through Grant Number UL1TR001873. The content is solely the responsibility of the authors and does not necessarily represent the official views of the NIH.

M.S.H., M.B. and A.T.M. are funded by a National Health and Medical Research Council (NHMRC) Centre of Research Excellence Grant (1116976). M.B. was funded by an NHMRC Senior Research Fellowship (ID:1102971).

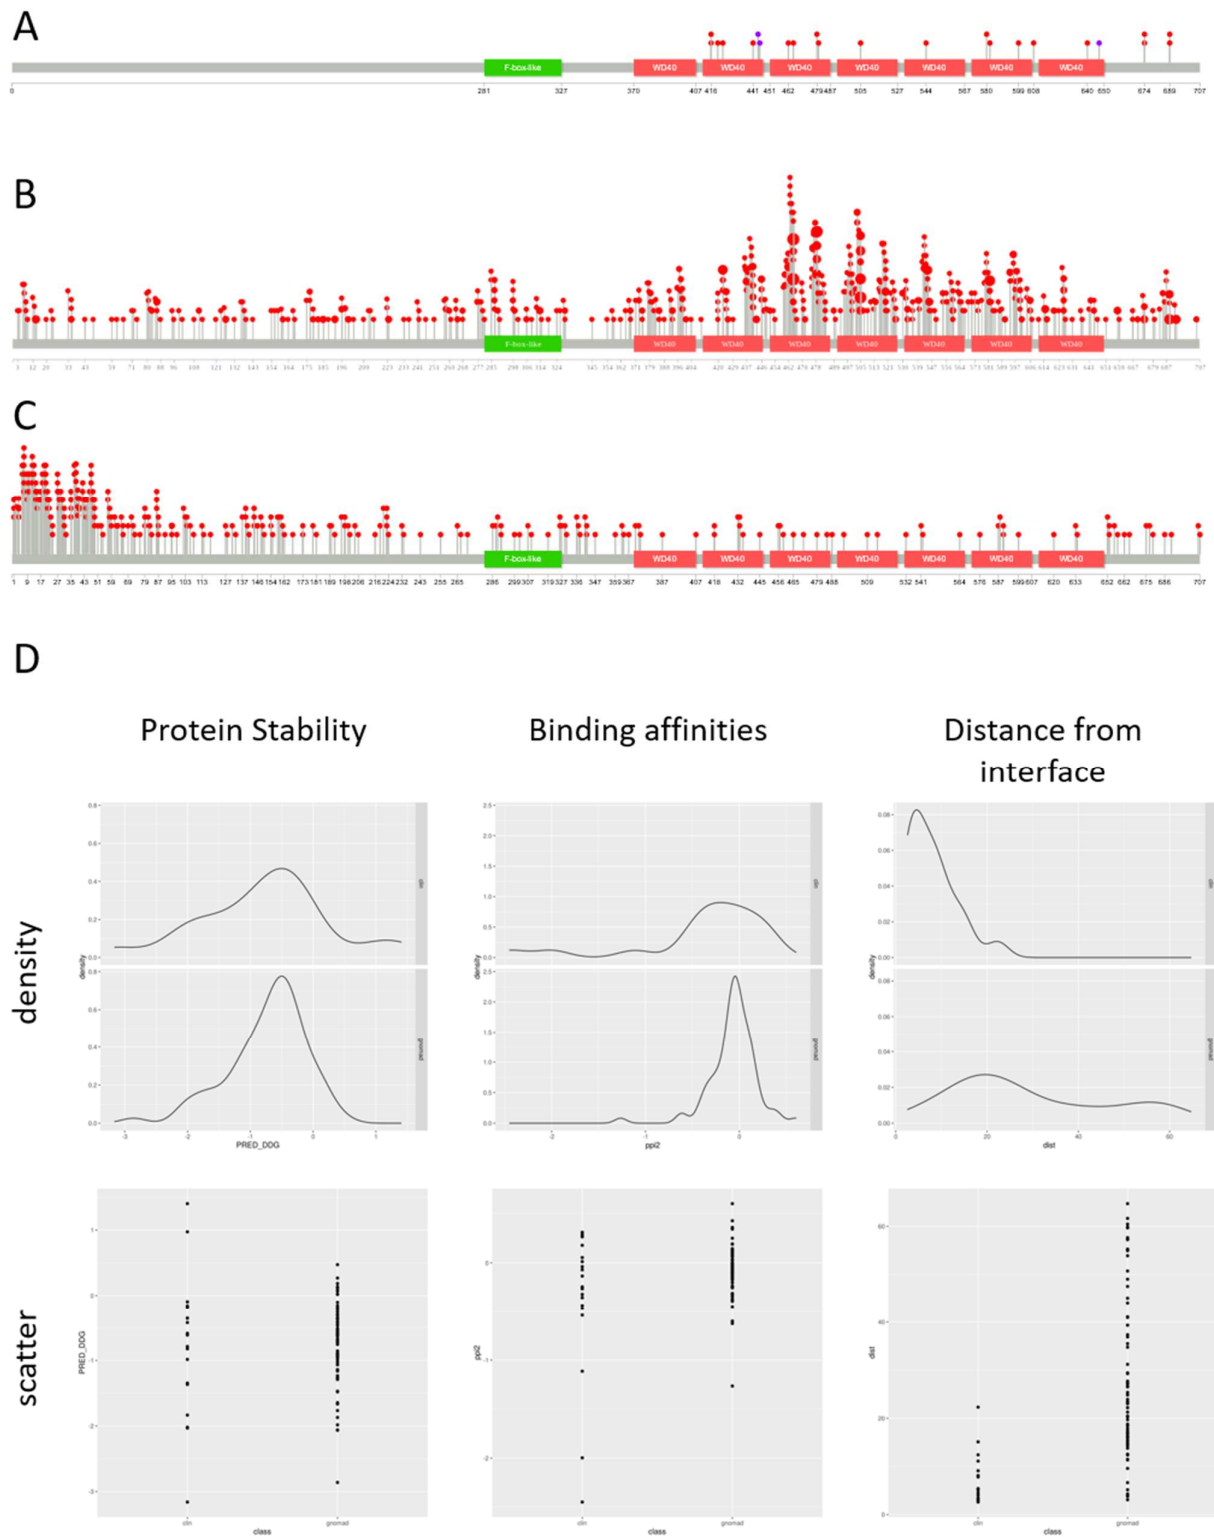

**Figure S1: Distribution of neurodevelopment variants within FBXW7 relative to known COSMIC and gnomAD variants.** (A) Location of patient-ascertained missense variants (red) and stop-gained and frameshift variants (purple). (B) Distribution of 1481 (440 unique) Catalogue Of Somatic Mutations In Cancer (COSMIC) somatic mutations (red) in FBXW7, where bubble size corresponds to the number of observations.

(C) Distribution of 280 missense variants (277 unique) in FBXW7 gnomAD v2.1 (140k exomes and genomes) variants with bubble size corresponding to the number of observations. (D) Comparison of structural predictors of neurodevelopmental disease variants to gnomAD variants. The gnomAD dataset was filtered to only those within the FBXW7 experimental structure, which includes residues 263 - 706, giving 78 variants only. Of these, the majority are very rare in the population (Allele Count: No. observations – 1:55, 2:14, 3:5, 6:2, 7:1, 12:1). Protein stability, determined using mutation Cutoff Scanning Matrix (mCSM), predicted the majority of gnomAD variants to also have a destabilizing effect, and to be similarly distributed to the patient cohort variants. Binding affinity, determined using mCSM-Protein–protein interactions (PPI) 1&2 ( $\Delta\Delta G$ ), suggests that gnomAD variants have a much smaller effect on binding affinity compared to the patient variants. Additionally, the gnomAD variants are dispersed throughout the structure and are, on average, further from the predicted interface with CYCLIN E1. See Table S3 for individual variant data.

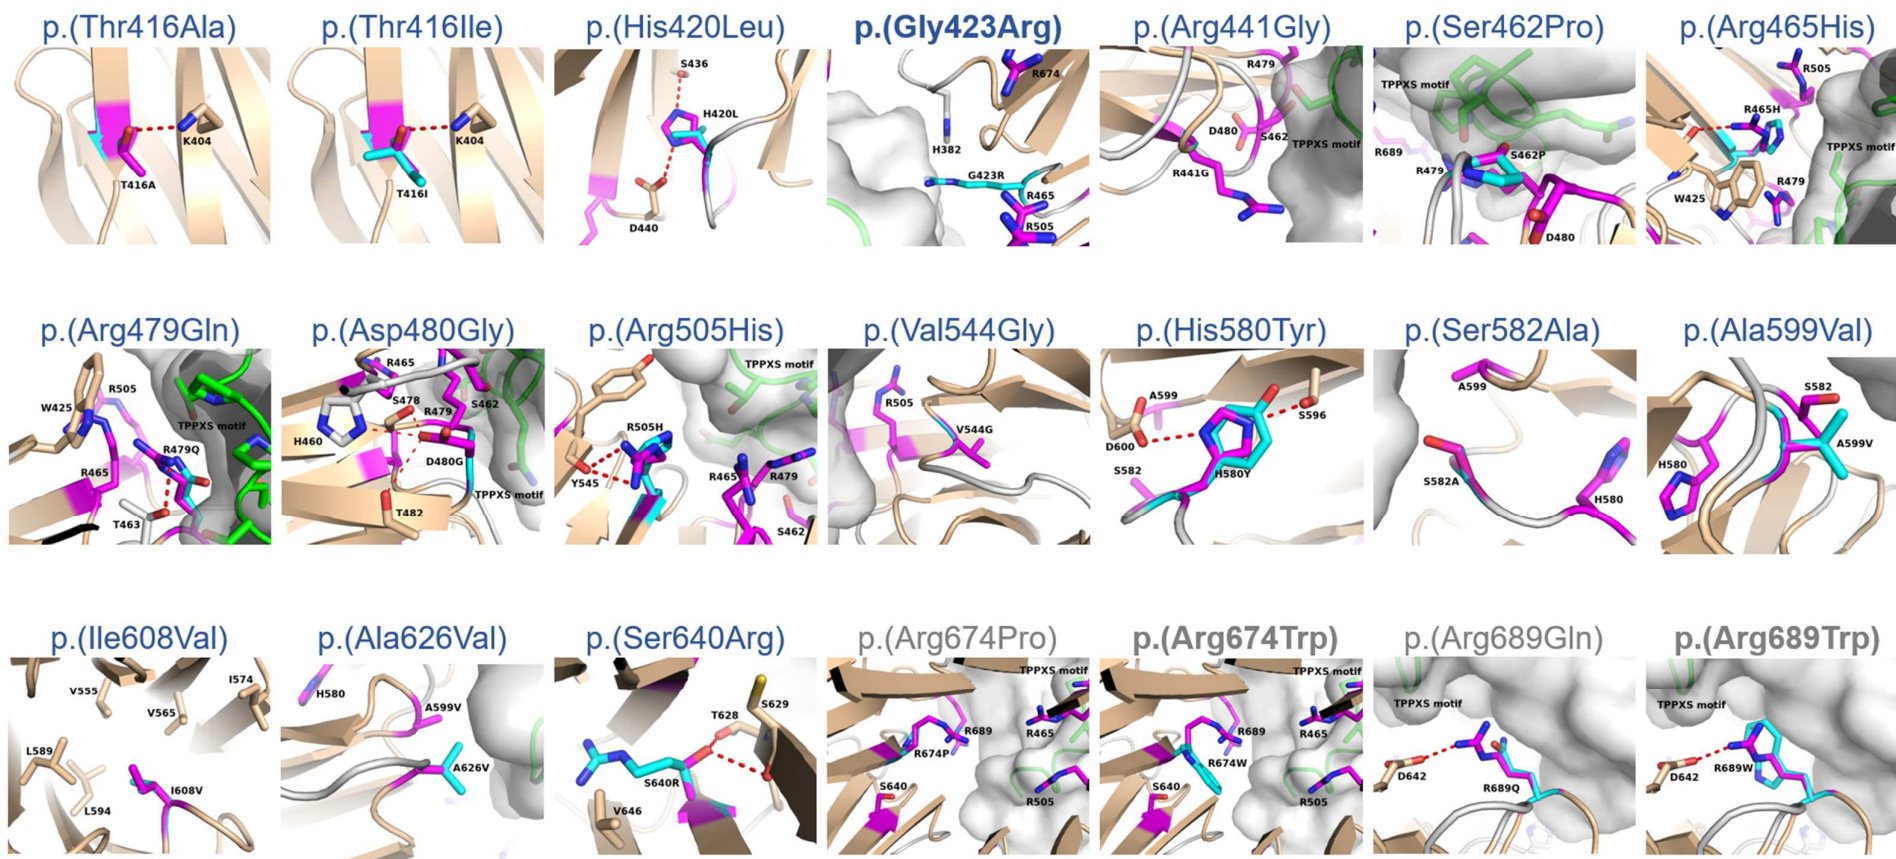

**Figure S2: Change in interaction with CYCLIN E1 predicted by each variant**

Zoom-in of the interaction of wild-type/variant residues of FBXW7 and its surrounding residues. The variant residues are overlaid on wild-type residues to identify the changes in interaction when variant occurs. FBXW7 is shown in brown ribbon, while CYCLIN E1 is shown in a light gray surface. All wild-type, and variant residues are shown in magenta and cyan sticks, respectively, while surrounding residues of FBXW7 and TPPXS motif of CYCLIN E1 are shown in brown and green sticks. The Oxygen and Nitrogen atoms are in red, and blue, respectively. Hydrogen bond interactions are shown in the red dash lines. Variants that reoccur are indicated by the bold title.



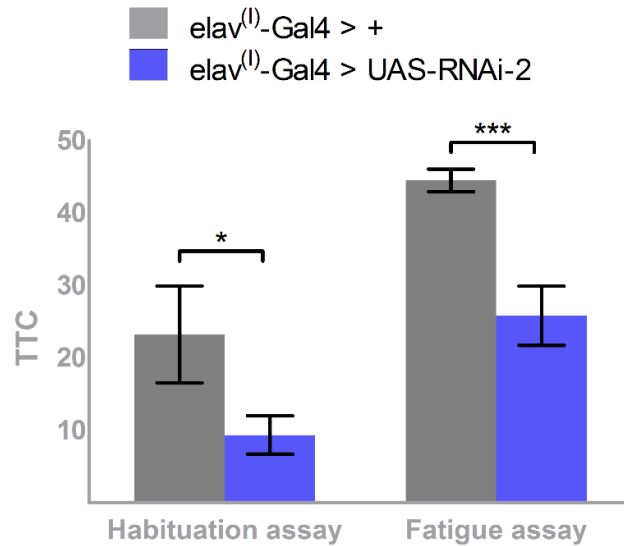

**Figure S4: Knockdown of ago in Drosophila neurons induced by the elav<sup>(l)</sup>-Gal4 driver causes faster decline of jump response due to fatigue**

The knockdown of ago leads to a lower mTTC compared to the controls. Increasing the inter-trial interval in the fatigue assay, preventing habituation from being formed, demonstrates that this lower TTC is not due to improved habituation but due to motor fatigue. Precise genotypes tested in the fatigue assay: elav<sup>(l)</sup> C155-Gal4, GMR-w1R /Y; +/+; +/+ of genetic background control in gray and elav<sup>(l)</sup> C155-Gal4, GMR-w1R /Y; +/+; UAS-RNAi-2/+ of RNAi-2 knockdown in blue. N<sub>control</sub> = 42, N<sub>RNAi-2</sub> = 48, mTTC<sub>control</sub> = 44.53, mTTC<sub>RNAi-2</sub> = 25.85, p = 1.35E-5. Statistical significance was assessed by a linear model regression analysis on the log transformed mTTC values, \* P < 0.05, \*\* P < 0.01, \*\*\* P < 0.001.



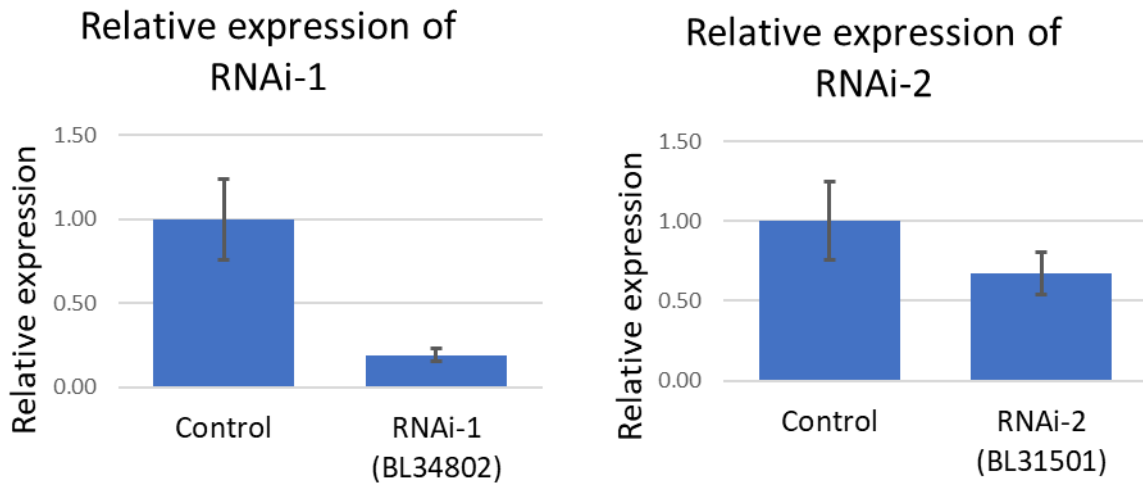

**Figure S5: Relative expression of ago in Drosophila knockdown lines**

Quantitative RT-PCR was performed on wandering L3 larva from RNAi-1 and RNAi-2 lines crossed to the ubiquitous Act-Gal4/TM3 Sb Tb driver to determine the level of *ago* expression using exon spanning primers to *ago* and  $\beta'$ COP. Error bars represent standard deviation.

Table S1: Analysis of FBXW7 neurodevelopmental syndrome variants

| Individual | Inheritance          | gDNA (Chr4; GRCh37)                                                                                                          | Exon      | cDNA           | Protein             | Occurs within WD40 domain | gnomAD - germline variants |                                               | COSMIC - somatic variants                                                                      |                                                                                                | CADD  |            | FATHMM |            | GERP++ RS             |       | MPC        |       | MTR        |       | MutationAssessor |                       |       | PROVEAN    |                       |       | Polyphen2  |                       |       | SIFT       |                       |       | VEST4      |      |      |   |   |
|------------|----------------------|------------------------------------------------------------------------------------------------------------------------------|-----------|----------------|---------------------|---------------------------|----------------------------|-----------------------------------------------|------------------------------------------------------------------------------------------------|------------------------------------------------------------------------------------------------|-------|------------|--------|------------|-----------------------|-------|------------|-------|------------|-------|------------------|-----------------------|-------|------------|-----------------------|-------|------------|-----------------------|-------|------------|-----------------------|-------|------------|------|------|---|---|
|            |                      |                                                                                                                              |           |                |                     |                           | Same variant               | Alternative change at same amino acid residue | Same variant                                                                                   | Alternative change at same amino acid residue                                                  | score | rank score | score  | rank score | predicted consequence | score | rank score | score | rank score | score | rank score       | predicted consequence | score | rank score | predicted consequence | score | rank score | predicted consequence | score | rank score | predicted consequence | score | rank score |      |      |   |   |
| 1          | de novo              | g.153249446_153249447del                                                                                                     | 11        | c.1331_1332del | p.(Lys444Serfs*27)  | NMD predicted             | Absent                     | 3 LoF variants upstream                       | Absent                                                                                         | p.(Lys444Glyfs*55), p.(Lys444Argfs*32), p.(Lys444Ilefs*2), more than 10 NMD predicted variants | -     | -          | -      | -          | -                     | -     | -          | -     | -          | -     | -                | -                     | -     | -          | -                     | -     | -          | -                     | -     | -          | -                     | -     | -          | -    | -    |   |   |
| 2          | de novo              | g.153249446dup                                                                                                               | 11        | c.1332dup      | p.(Val445Serfs*27)  | NMD predicted             | Absent                     | 3 LoF variants upstream                       | Absent                                                                                         | p.(Val445Cysfs*53), p.(Val445Aspfs*27), more than 10 NMD predicted variants                    | -     | -          | -      | -          | -                     | -     | -          | -     | -          | -     | -                | -                     | -     | -          | -                     | -     | -          | -                     | -     | -          | -                     | -     | -          | -    | -    |   |   |
| 3          | familial             | g.153245477_153245478del                                                                                                     | 13        | c.1713_1714del | p.(Asn572Leufs*32)  | Truncation predicted      | Absent                     | 3 LoF variants upstream                       | Absent                                                                                         | More than 10 NMD predicted variants                                                            | -     | -          | -      | -          | -                     | -     | -          | -     | -          | -     | -                | -                     | -     | -          | -                     | -     | -          | -                     | -     | -          | -                     | -     | -          | -    | -    | - | - |
| 4          |                      |                                                                                                                              |           |                |                     |                           |                            |                                               |                                                                                                |                                                                                                |       |            |        |            |                       |       |            |       |            |       |                  |                       |       |            |                       |       |            |                       |       |            |                       |       |            |      |      |   |   |
| 5          |                      |                                                                                                                              |           |                |                     |                           |                            |                                               |                                                                                                |                                                                                                |       |            |        |            |                       |       |            |       |            |       |                  |                       |       |            |                       |       |            |                       |       |            |                       |       |            |      |      |   |   |
| 6          |                      |                                                                                                                              |           |                |                     |                           |                            |                                               |                                                                                                |                                                                                                |       |            |        |            |                       |       |            |       |            |       |                  |                       |       |            |                       |       |            |                       |       |            |                       |       |            |      |      |   |   |
| 7          | de novo              | g.153244218T>A                                                                                                               | 14        | c.1939A>T      | p.(Lys647*)         | Truncation predicted      | Absent                     | 3 LoF variants upstream                       | Absent                                                                                         | p.(Lys647Asnfs*5) in stomach carcinoma, more than 10 NMD predicted variants                    | -     | -          | -      | -          | -                     | -     | -          | -     | -          | -     | -                | -                     | -     | -          | -                     | -     | -          | -                     | -     | -          | -                     | -     | -          | -    | -    | - |   |
| 8          | de novo              | g.153250822A>T                                                                                                               | intron 10 | c.1236+2T>A    | p.?                 | N/A                       | Absent                     | Alternative change at same nucleotide: Absent | Present (stomach carcinoma)                                                                    | Alternative change at same nucleotide: c.1236+2T>C (large intestine adenocarcinoma)            | -     | -          | -      | -          | -                     | -     | -          | -     | -          | -     | -                | -                     | -     | -          | -                     | -     | -          | -                     | -     | -          | -                     | -     | -          | -    | -    | - |   |
| 9          | de novo              | arr[GRCh37]4q31.3(152720434_153661857)x1 dn                                                                                  | N/A       | N/A            | Entire gene deleted | N/A                       | N/A                        | N/A                                           | N/A                                                                                            | N/A                                                                                            | -     | -          | -      | -          | -                     | -     | -          | -     | -          | -     | -                | -                     | -     | -          | -                     | -     | -          | -                     | -     | -          | -                     | -     | -          | -    | -    | - |   |
| 10         | de novo              | arr[GRCh37]4q31.3q32.1(152854578_156285170)x1 dn,4q32.1q34.1(161464002_175617314)x3 dn,4q34.1q34.3(175858796_179802170)x3 dn | N/A       | N/A            | Entire gene deleted | N/A                       | N/A                        | N/A                                           | N/A                                                                                            | N/A                                                                                            | -     | -          | -      | -          | -                     | -     | -          | -     | -          | -     | -                | -                     | -     | -          | -                     | -     | -          | -                     | -     | -          | -                     | -     | -          | -    | -    | - |   |
| 11         | de novo              | g.153249531G>A                                                                                                               | 11        | c.1247C>T      | p.(Thr416Ile)       | Yes                       | Absent                     | Absent                                        | Absent                                                                                         | Absent                                                                                         | 4.22  | 0.86       | 0.13   | 0.61       | T                     | 5.90  | 0.95       | 2.78  | 0.99       | 0.56  | 0.97             | 1.37                  | 0.34  | L          | -5.66                 | 0.87  | D          | 1.00                  | 0.92  | D          | 0.05                  | 0.56  | D          | 0.78 | 0.80 |   |   |
| 12         | familial             | g.153249532T>C                                                                                                               | 11        | c.1246A>G      | p.(Thr416Ala)       | Yes                       | Absent                     | Absent                                        | Absent                                                                                         | Absent                                                                                         | 4.08  | 0.81       | 0.04   | 0.62       | T                     | 5.90  | 0.95       | 2.40  | 0.97       | 0.56  | 0.97             | 1.71                  | 0.44  | L          | -4.80                 | 0.81  | D          | 0.98                  | 0.81  | D          | 0.02                  | 0.59  | D          | 0.80 | 0.81 |   |   |
| 13         | de novo              | g.153249519T>A                                                                                                               | 11        | c.1259A>A      | p.(His420Leu)       | Yes                       | Absent                     | Absent                                        | Absent                                                                                         | Multiple                                                                                       | 4.13  | 0.83       | -1.50  | 0.81       | D                     | 5.90  | 0.95       | 3.08  | 0.99       | 0.87  | 0.59             | 4.72                  | 1.00  | H          | -10.92                | 0.99  | D          | 1.00                  | 0.97  | D          | 0.00                  | 0.91  | D          | 0.94 | 0.95 |   |   |
| 14         | de novo              | g.153249511C>T                                                                                                               | 11        | c.1267G>A      | p.(Gly423Arg)       | Yes                       | Absent                     | Absent                                        | Present (multiple tissue types)                                                                | Multiple                                                                                       | 4.35  | 0.89       | 0.16   | 0.61       | T                     | 5.90  | 0.95       | 3.01  | 0.99       | 0.67  | 0.92             | 1.21                  | 0.30  | L          | -7.94                 | 0.96  | D          | 1.00                  | 0.97  | D          | 0.00                  | 0.91  | D          | 0.94 | 0.96 |   |   |
| 15         |                      |                                                                                                                              |           |                |                     |                           |                            |                                               |                                                                                                |                                                                                                |       |            |        |            |                       |       |            |       |            |       |                  |                       |       |            |                       |       |            |                       |       |            |                       |       |            |      |      |   |   |
| 16         | de novo              | g.153249457G>C                                                                                                               | 11        | c.1321C>G      | p.(Arg441Gly)       | Yes                       | Absent                     | Absent                                        | Present (lung carcinoma, rhabdomyosarcoma)                                                     | Multiple                                                                                       | 3.72  | 0.70       | 2.02   | 0.21       | T                     | 4.08  | 0.47       | 3.14  | 0.99       | 0.55  | 0.97             | 0.42                  | 0.13  | N          | -6.83                 | 0.93  | D          | 0.99                  | 0.80  | D          | 0.03                  | 0.91  | D          | 0.84 | 0.86 |   |   |
| 17         | de novo              | g.153249394A>G                                                                                                               | 11        | c.1384T>C      | p.(Ser462Pro)       | Yes                       | Absent                     | Absent                                        | Absent                                                                                         | p.(Ser462Tyr), p.(Ser462Phe)                                                                   | 4.33  | 0.89       | 0.86   | 0.74       | T                     | 6.05  | 0.98       | 2.78  | 0.99       | 0.54  | 0.97             | 2.65                  | 0.77  | M          | -4.96                 | 0.82  | D          | 0.93                  | 0.92  | D          | 0.00                  | 0.78  | D          | 0.87 | 0.89 |   |   |
| 18         | de novo              | g.153249384C>T                                                                                                               | 11        | c.1394G>A      | p.(Arg465His)       | Yes                       | Absent                     | p.(Arg465Cys) (allele balance 45% or lower)   | Present (more than 5 tissue types)                                                             | Multiple                                                                                       | 4.17  | 0.84       | 0.97   | 0.43       | T                     | 6.05  | 0.98       | 3.08  | 0.99       | 0.61  | 0.95             | 1.26                  | 0.32  | L          | -4.96                 | 0.82  | D          | 1.00                  | 0.97  | D          | 0.02                  | 0.91  | D          | 0.78 | 0.79 |   |   |
| 19         | de novo (mosaic 14%) | g.153247366C>T                                                                                                               | 12        | c.1436G>A      | p.(Arg479Gln)       | Yes                       | Absent                     | p.(Arg479Gly) (allele balance 25-30%)         | Present (more than 5 tissue types)                                                             | Multiple                                                                                       | 4.17  | 0.84       | 1.02   | 0.41       | T                     | 5.72  | 0.89       | 2.93  | 0.99       | 0.80  | 0.75             | 0.84                  | 0.21  | L          | -3.97                 | 0.74  | D          | 1.00                  | 0.97  | D          | 0.02                  | 0.51  | D          | 0.64 | 0.65 |   |   |
| 20         | de novo              | g.153247363T>C                                                                                                               | 12        | c.1439A>G      | p.(Asp480Gly)       | Yes                       | Absent                     | Absent                                        | Present (colon adenocarcinoma)                                                                 | Multiple                                                                                       | 4.46  | 0.91       | -2.49  | 0.89       | D                     | 5.72  | 0.89       | 3.19  | 0.99       | 0.86  | 0.60             | 3.93                  | 0.96  | H          | -6.95                 | 0.93  | D          | 1.00                  | 0.97  | D          | 0.00                  | 0.91  | D          | 0.99 | 0.99 |   |   |
| 21         | de novo              | g.153247288C>T                                                                                                               | 12        | c.1514G>A      | p.(Arg505His)       | Yes                       | Absent                     | Absent                                        | Present (more than 5 tissue types)                                                             | Multiple                                                                                       | 4.17  | 0.85       | 0.05   | 0.62       | T                     | 4.87  | 0.63       | 3.08  | 0.99       | 0.55  | 0.97             | 1.50                  | 0.38  | L          | -4.96                 | 0.82  | D          | 1.00                  | 0.97  | D          | 0.01                  | 0.78  | D          | 0.75 | 0.75 |   |   |
| 22         | de novo              | g.153247171A>C                                                                                                               | 12        | c.1631T>G      | p.(Val544Gly)       | Yes                       | Absent                     | Absent                                        | Present (large intestine adenocarcinoma)                                                       | p.(Val544Asp) (mouth squamous cell carcinoma)                                                  | 4.29  | 0.88       | -0.79  | 0.74       | T                     | 5.72  | 0.89       | 3.18  | 0.99       | 0.55  | 0.97             | 4.32                  | 0.98  | H          | -6.95                 | 0.93  | D          | 1.00                  | 0.92  | D          | 0.00                  | 0.91  | D          | 0.64 | 0.66 |   |   |
| 23         | de novo              | g.153245453G>A                                                                                                               | 13        | c.1738C>T      | p.(His580Tyr)       | Yes                       | Absent                     | Absent                                        | Present (large intestine adenocarcinoma)                                                       | Multiple                                                                                       | 4.09  | 0.82       | -1.49  | 0.81       | T                     | 5.70  | 0.89       | 2.95  | 0.99       | 0.75  | 0.84             | 4.04                  | 0.97  | H          | -5.96                 | 0.89  | D          | 1.00                  | 0.97  | D          | 0.01                  | 0.56  | D          | 0.89 | 0.89 |   |   |
| 24         | de novo              | g.153245447A>C                                                                                                               | 13        | c.1744T>G      | p.(Ser582Ala)       | Yes                       | Absent                     | Absent                                        | Absent                                                                                         | Multiple                                                                                       | 4.02  | 0.79       | 1.00   | 0.41       | T                     | 5.70  | 0.89       | 0.97  | 0.97       | 0.76  | 0.83             | 1.46                  | 0.37  | L          | -2.70                 | 0.61  | D          | 0.98                  | 0.75  | D          | 0.10                  | 0.59  | T          | 0.66 | 0.67 |   |   |
| 25         | de novo (mosaic 23%) | g.153245395G>A                                                                                                               | 13        | c.1796C>T      | p.(Ala599Val)       | Yes                       | Absent                     | p.(Ala599Gly) (allele balance 35-40%)         | Absent                                                                                         | Absent                                                                                         | 4.29  | 0.88       | 0.94   | 0.44       | T                     | 5.45  | 0.80       | 2.69  | 0.99       | 0.86  | 0.62             | 0.86                  | 0.21  | L          | -3.96                 | 0.74  | D          | 1.00                  | 0.84  | D          | 0.02                  | 0.78  | D          | 0.63 | 0.64 |   |   |
| 26         | de novo              | g.153244280G>A                                                                                                               | 14        | c.1877C>T      | p.(Ala626Val)       | Yes                       | Absent                     | Absent                                        | Present (large intestine adenocarcinoma)                                                       | p.(Ala626Thr), p.(Ala626Pro), p.(Ala626Asp)                                                    | 4.13  | 0.83       | 0.96   | 0.43       | T                     | 5.67  | 0.88       | 2.73  | 0.99       | 0.63  | 0.94             | 1.71                  | 0.44  | L          | -3.91                 | 0.74  | D          | 1.00                  | 0.91  | D          | 0.00                  | 0.78  | D          | 0.74 | 0.76 |   |   |
| 27         | de novo              | g.153244237G>T                                                                                                               | 14        | c.1920C>A      | p.(Ser640Arg)       | Yes                       | Absent                     | Absent                                        | Absent                                                                                         | Absent                                                                                         | 3.40  | 0.62       | 0.97   | 0.43       | T                     | 3.03  | 0.34       | 2.87  | 0.99       | 0.81  | 0.72             | 2.58                  | 0.75  | M          | -4.91                 | 0.82  | D          | 1.00                  | 0.92  | D          | 0.06                  | 0.60  | T          | 0.87 | 0.92 |   |   |
| 28         | de novo              | g.153245369T>C                                                                                                               | 13        | c.1822A>G      | p.(Ile608Val)       | No                        | Absent                     | Absent                                        | Absent                                                                                         | Absent                                                                                         | 2.43  | 0.40       | 0.90   | 0.45       | T                     | 5.45  | 0.80       | 1.39  | 0.85       | 0.37  | 0.99             | 0.18                  | 0.09  | N          | -0.86                 | 0.23  | N          | 0.05                  | 0.30  | B          | 0.22                  | 0.19  | T          | 0.36 | 0.41 |   |   |
| 29         | de novo              | g.153244136C>G                                                                                                               | 14        | c.2021G>C      | p.(Arg674Pro)       | No                        | Absent                     | Absent                                        | Absent                                                                                         | p.(Arg674Trp), p.(Arg674Gln)                                                                   | 4.13  | 0.83       | 2.21   | 0.18       | T                     | 4.82  | 0.62       | 3.35  | 1.00       | 0.52  | 0.98             | 2.67                  | 0.78  | M          | -6.83                 | 0.93  | D          | 1.00                  | 0.89  | D          | 0.00                  | 0.78  | D          | 0.81 | 0.85 |   |   |
| 30         | de novo              | g.153244137G>A                                                                                                               | 14        | c.2020C>T      | p.(Arg674Trp)       | No                        | Absent                     | Absent                                        | Present (glioma, cervix squamous cell carcinoma, atypical meningioma, prostate adenocarcinoma) | p.(Arg674Gln) (colon adenocarcinoma, stomach adenocarcinoma)                                   | 3.77  | 0.71       | 2.20   | 0.19       | T                     | 1.62  | 0.23       | 2.77  | 0.99       | 0.52  | 0.98             | 2.67                  | 0.78  | M          | -7.80                 | 0.96  | D          | 1.00                  | 0.92  | D          | 0.00                  | 0.91  | D          | 0.80 | 0.88 |   |   |
| 31         |                      |                                                                                                                              |           |                |                     |                           |                            |                                               |                                                                                                |                                                                                                |       |            |        |            |                       |       |            |       |            |       |                  |                       |       |            |                       |       |            |                       |       |            |                       |       |            |      |      |   |   |
| 32         | de novo              | g.153244091C>T                                                                                                               | 14        | c.2066G>A      | p.(Arg689Gln)       | No                        | Absent                     | Absent                                        | Present (more than 5 tissue types)                                                             | p.(Arg689Glu), p.(Arg689Trp)                                                                   | 4.14  | 0.83       | 2.25   | 0.18       | T                     | 4.82  | 0.62       | 2.62  | 0.98       | 0.40  | 0.99             | 2.70                  | 0.79  | M          | -3.92                 | 0.73  | D          | 1.00                  | 0.89  | D          | 0.03                  | 0.68  | D          | 0.82 | 0.87 |   |   |
| 33         | de novo              | g.153244092G>A                                                                                                               | 14        | c.2065C>T      | p.(Arg689Trp)       | No                        | Absent                     | Absent                                        | Present (more than 5 tissue types)                                                             | p.(Arg689Glu), p.(Arg689Gln)                                                                   | 4.22  | 0.86       | 2.20   | 0.19       | T                     | 5.67  | 0.88       | 2.77  | 0.99       | 0.40  | 0.99             | 2.70                  | 0.79  | M          | -7.88                 | 0.96  | D          | 1.00                  | 0.97  | D          | 0.03                  | 0.91  | D          | 0.86 | 0.91 |   |   |
| 34         |                      |                                                                                                                              |           |                |                     |                           |                            |                                               |                                                                                                |                                                                                                |       |            |        |            |                       |       |            |       |            |       |                  |                       |       |            |                       |       |            |                       |       |            |                       |       |            |      |      |   |   |
| 35         |                      |                                                                                                                              |           |                |                     |                           |                            |                                               |                                                                                                |                                                                                                |       |            |        |            |                       |       |            |       |            |       |                  |                       |       |            |                       |       |            |                       |       |            |                       |       |            |      |      |   |   |

Tolerated (T); Deleterious (D); Low (L); Medium (M); High (H); Combined Annotation Dependent Depletion (CADD); Functional Analysis through Hidden Markov Models (FATHMM); Genomic Evolutionary Rate Profiling (GERP) ++ rejected substitutions\* (RS) score; missense badness, PolyPhen-2, and constraint (MPC); Missense Tolerance Ratio (MTR); Protein Variation Effect Analyzer (PROVEAN); Polymorphism Phenotyping v2 (PolyPhen-2); Sorting Intolerant From Tolerant (SIFT); Variant Effect Scoring Tool (VEST).



**Table S3: HPO terms associated with FBXW7 Neurodevelopmental syndrome**

|                       |                                                                                                                                                                                                                                                                                                                                                                                                                                                                                                                                                                                                                                                                                                          |                                                                                                                                                                                                                                                                                                                                                                                                                                                                                                                                                                                                                                                                                                                                                                                       |                                                 |                                                                                                                                                                                                                                                                                                                                                                                                                                              |                          |                                                                                                                                                                                                                                                                                                                                                                                                                                                      |                 |                                                                                                                                                                                                                                                                                                                                                                                                                                                                                                                                                                                                                                                                                                                                                                                                                                                                                                                                                                                                                                                                                                                                                                                                                                                                                                                                                                                                                                                                                                                                                                                                                                                                                           |            |                                                                                                                                                                                                                                                                                                                                                                                                                                                                                                |
|-----------------------|----------------------------------------------------------------------------------------------------------------------------------------------------------------------------------------------------------------------------------------------------------------------------------------------------------------------------------------------------------------------------------------------------------------------------------------------------------------------------------------------------------------------------------------------------------------------------------------------------------------------------------------------------------------------------------------------------------|---------------------------------------------------------------------------------------------------------------------------------------------------------------------------------------------------------------------------------------------------------------------------------------------------------------------------------------------------------------------------------------------------------------------------------------------------------------------------------------------------------------------------------------------------------------------------------------------------------------------------------------------------------------------------------------------------------------------------------------------------------------------------------------|-------------------------------------------------|----------------------------------------------------------------------------------------------------------------------------------------------------------------------------------------------------------------------------------------------------------------------------------------------------------------------------------------------------------------------------------------------------------------------------------------------|--------------------------|------------------------------------------------------------------------------------------------------------------------------------------------------------------------------------------------------------------------------------------------------------------------------------------------------------------------------------------------------------------------------------------------------------------------------------------------------|-----------------|-------------------------------------------------------------------------------------------------------------------------------------------------------------------------------------------------------------------------------------------------------------------------------------------------------------------------------------------------------------------------------------------------------------------------------------------------------------------------------------------------------------------------------------------------------------------------------------------------------------------------------------------------------------------------------------------------------------------------------------------------------------------------------------------------------------------------------------------------------------------------------------------------------------------------------------------------------------------------------------------------------------------------------------------------------------------------------------------------------------------------------------------------------------------------------------------------------------------------------------------------------------------------------------------------------------------------------------------------------------------------------------------------------------------------------------------------------------------------------------------------------------------------------------------------------------------------------------------------------------------------------------------------------------------------------------------|------------|------------------------------------------------------------------------------------------------------------------------------------------------------------------------------------------------------------------------------------------------------------------------------------------------------------------------------------------------------------------------------------------------------------------------------------------------------------------------------------------------|
| Prenatal history      | Thickened nuchal skin fold HP:0000474<br>Jaundice HP:0000952<br>Breech presentation HP:0001623<br>Neonatal hypoglycemia HP:0001998<br>Hyperechogenic kidneys HP:0004719<br>Neonatal respiratory distress HP:0002643                                                                                                                                                                                                                                                                                                                                                                                                                                                                                      | Global developmental delay HP:0001263<br>Intellectual disability, borderline HP:0006889<br>Anxiety HP:0000739<br>Poor suck HP:0002033<br>Motor delay HP:0001270<br>Specific learning disability HP:0001328<br>Delayed speech and language development HP:0000750<br>Speech articulation difficulties HP:0009088<br>Sleep disturbance HP:0002360<br>Impulsivity HP:01007710<br>Short attention span HP:0000736<br>Autistic behavior HP:0000729<br>Speech apraxia HP:0011098<br>Developmental regression HP:0002376<br>Hair-pulling HP:0012167<br>Depression HP:0000716                                                                                                                                                                                                                 | Cardiac problems                                | Bicuspid aortic valve HP:0001647<br>Patent ductus arteriosus HP:0001643<br>Atrial septal defect HP:0001631<br>Ventricular septal defect HP:0001629<br>Interrupted aortic arch HP:0011611<br>Subvalvular aortic stenosis HP:0001682<br>Abnormal left ventricular function HP:0005162<br>Secundum atrial septal defect HP:0001684<br>Persistent left superior vena cava HP:0005301<br>Patent foramen ovale HP:0001655<br>Mesocardia HP:0011599 | Hematologic problems     | Neutropenia HP:0001875<br>Thrombocytopenia HP:0001873<br>Normocytic anemia HP:0001897<br>Iron deficiency anemia HP:0001891<br>Anemia HP:0001903                                                                                                                                                                                                                                                                                                      | Growth          | Short stature HP:0004322<br>Tall stature HP:0000098<br>Obesity HP:0001513<br>Macrocephaly HP:0000256<br>Microcephaly HP:0000252                                                                                                                                                                                                                                                                                                                                                                                                                                                                                                                                                                                                                                                                                                                                                                                                                                                                                                                                                                                                                                                                                                                                                                                                                                                                                                                                                                                                                                                                                                                                                           | Hands/feet | Tapered finger HP:0001182<br>Single transverse palmar crease HP:0000954<br>Short foot HP:0001773<br>Pes planus HP:0001763<br>Overlapping toe HP:0001845<br>Clinodactyly HP:0030084<br>Metatarsus adductus HP:0001840<br>2-3 toe syndactyly HP:0004691<br>Prominent fingertip pads HP:0001212<br>Finger swelling HP:0025131<br>Short 5th finger HP:0009237<br>Interphalangeal joint contracture of finger HP:0001220<br>Prominent calcaneus HP:0012428<br>Abnormality of the 2nd toe HP:0010319 |
| Neurological problems | Hypotonia HP:0001252<br>Seizure HP:0001250<br>Progressive spasticity HP:0002191<br>Unsteady gait HP:0002317<br>Broad-based gait HP:0002136<br>Paroxysmal tonic upgaze HP:0033980<br>Early onset absence seizures HP:0011152<br>Achilles tendon contracture HP:0001771<br>Abnormality of coordination HP:0011443<br>Migraine HP:0002076<br>Photophobia HP:0000613<br>Ataxia HP:0001251<br>Dyskinesia HP:0100660<br>Stereotypy HP:0000733<br>Drooling HP:0002307<br>Atonic seizure HP:0010819                                                                                                                                                                                                              | Ophthalmologic problems                                                                                                                                                                                                                                                                                                                                                                                                                                                                                                                                                                                                                                                                                                                                                               | Respiratory problems                            | Obstructive sleep apnea HP:0002870<br>Snoring HP:0025267<br>Asthma HP:0002099<br>Recurrent pneumonia HP:0006532<br>Recurrent sinusitis HP:0011108<br>Abnormality of the maxillary sinus HP:0430023<br>Recurrent upper respiratory tract infections HP:0002788<br>Bronchitis HP:0012387                                                                                                                                                       | Musculoskeletal problems | Sprengel anomaly HP:0000912<br>Webbed neck HP:0000465<br>Joint laxity HP:0001388<br>Short finger HP:0009381<br>Broad thumb HP:0011304<br>Increased muscle fatigability HP:0003750<br>Pectus excavatum HP:0000767<br>Pectus carinatum HP:0000768<br>Hemihypertrophy HP:0001528<br>Scoliosis HP:0002650<br>Hip dislocation HP:0002827<br>Hypertonia HP:0001276<br>Kyphosis HP:0002808<br>Calcaneovalgus deformity HP:0001848<br>Genu valgum HP:0002857 | Facial features | Broad forehead HP:0000337<br>Abnormal nasal bridge morphology HP:0000422<br>Periorbital fullness HP:0000629<br>Malar flattening HP:0000272<br>Deeply set eye HP:0000490<br>Thin vermilion border HP:0000233<br>Underdeveloped superior crus of antihelix HP:0011246<br>Preauricular pit HP:0004467<br>Epicanthus HP:0000286<br>Thick eyebrow HP:0000574<br>Synophrys HP:0000664<br>Large earlobe HP:0009748<br>Downturned corners of mouth HP:0002714<br>Prominent forehead HP:0011220<br>Hypertelorism HP:0000316<br>Telecanthus HP:0000506<br>Almond-shaped palpebral fissure HP:0007874<br>Low-set, posteriorly rotated ears HP:0000368<br>Prominent metopic ridge HP:0005487<br>Dolichocephaly HP:0000268<br>Flat occiput HP:0005469<br>Wide nasal bridge HP:0000431<br>Eversion of lateral third of lower eyelids HP:0007655<br>Thickened helices HP:0000391<br>Microtia HP:0008551<br>Micrognathia HP:0000347<br>Smooth philtrum HP:0000319<br>Highly arched eyebrow HP:0002553<br>Myopathic facies HP:0002058<br>Hypotelorism HP:0000601<br>Prominent eyelashes HP:0011231<br>Long palpebral fissure HP:0000637<br>Downslanted palpebral fissures HP:0000494<br>Anteverted nares HP:0000463<br>Overfolded helix HP:0000396<br>Prominent inferior crus of antihelix HP:0011238<br>Narrow mouth HP:0000160<br>Short nose HP:0003196<br>Prominent nasal tip HP:0005274<br>Tented upper lip vermilion HP:0010804<br>Deep philtrum HP:0002002<br>Scaphocephaly HP:0030799<br>Prominent occiput HP:0000269<br>Anteverted ears HP:0040080<br>Depressed nasal bridge HP:0005280<br>Low anterior hairline HP:0000294<br>Thick vermilion border HP:0012471<br>Incisor macrodontia HP:0011081 | Other      | Supernumerary nipple HP:0002558<br>Narrow chest HP:0000774<br>Umbilical hernia HP:0001537                                                                                                                                                                                                                                                                                                                                                                                                      |
| Brain Imaging         | Enlarged cerebellum HP:0012081<br>Arnold-Chiari type I malformation HP:0007099<br>Thin corpus callosum HP:0033725<br>Agenesis of corpus callosum HP:0001274<br>Abnormal corpus callosum morphology HP:0001273<br>Punctate periventricular T2 hyperintense foci HP:0030081<br>Aplasia/Hypoplasia of the cerebellum HP:0007360<br>Enlarged cisterna magna HP:0002280<br>Abnormal brainstem morphology HP:0002363<br>Brain atrophy HP:0012444<br>Subcortical white matter calcifications HP:0007346<br>Delayed myelination HP:0012448<br>Extra-axial cerebrospinal fluid accumulation HP:0012510<br>Polymicrogyria HP:0002126<br>Ventriculomegaly HP:0002119<br>Dilation of Virchow-Robin spaces HP:0012520 | Audiology / hearing                                                                                                                                                                                                                                                                                                                                                                                                                                                                                                                                                                                                                                                                                                                                                                   | Gastrointestinal problems/ feeding difficulties | Feeding difficulties HP:0011968<br>Nasogastric tube feeding in infancy HP:0011470<br>Chronic constipation HP:0012450<br>Polyphagia HP:0002591<br>Gastroesophageal reflux HP:0002020<br>Velopharyngeal insufficiency HP:0000220<br>Constipation HP:0002019<br>Failure to thrive HP:0001508<br>Diarrhea HP:0002014                                                                                                                             | Immunological problems   | Decreased circulating antibody level HP:0004313<br>Recurrent fever HP:0001954                                                                                                                                                                                                                                                                                                                                                                        |                 |                                                                                                                                                                                                                                                                                                                                                                                                                                                                                                                                                                                                                                                                                                                                                                                                                                                                                                                                                                                                                                                                                                                                                                                                                                                                                                                                                                                                                                                                                                                                                                                                                                                                                           |            |                                                                                                                                                                                                                                                                                                                                                                                                                                                                                                |
|                       | Oral / dentition / other ENT problems                                                                                                                                                                                                                                                                                                                                                                                                                                                                                                                                                                                                                                                                    | Otitis media with effusion HP:0031353<br>Submucous cleft of soft and hard palate HP:0410031<br>High palate HP:0000218<br>Widely spaced teeth HP:0000687<br>Cleft soft palate HP:0000185<br>Dental malocclusion HP:0000689<br>Midface retrusion HP:0011800<br>Ankyloglossia HP:0010296<br>Poor suck HP:0002033<br>Impaired oropharyngeal swallow response HP:0031162<br>Episodic upper airway obstruction HP:0012271<br>Short uvula HP:0010812<br>Anterior open-bite malocclusion HP:0009102<br>Carious teeth HP:0000670<br>Laryngeal cleft HP:0008751<br>Delayed eruption of teeth HP:0000684<br>Laryngomalacia HP:0001601<br>Narrow palate HP:0000189<br>Abnormal ear morphology HP:0031703<br>Bifid uvula HP:0000193<br>Nasal speech HP:0001611<br>Deviated nasal septum HP:0004411 | Renal / genitourinary problems                  | Bilateral cryptorchidism HP:0008689<br>Multicystic kidney dysplasia HP:0000003<br>Enlarged kidney HP:0000105<br>Nocturia HP:0000017<br>Inguinal hernia HP:0000023<br>Urinary incontinence HP:0000020<br>Micropenis HP:0000054<br>Decreased testicular size HP:0008734<br>Ventral shortening of foreskin HP:0012435<br>Abnormal renal corticomedullary differentiation HP:0005932                                                             | Skin problems            | Acne HP:0001061<br>Telangiectasia HP:0001009<br>Blue nevus HP:0100814<br>Hypertrichosis HP:0000998<br>Melanocytic nevus HP:0000995<br>Poliosis HP:0002290<br>Hypopigmentation of the skin HP:0001010<br>Distributed along Blaschko lines HP:0025293<br>Cafe-au-lait spot HP:0000957<br>Hyperpigmentation of the skin HP:0000953<br>Nevus flammeus HP:0001052<br>Capillary hemangioma HP:0005306                                                      |                 |                                                                                                                                                                                                                                                                                                                                                                                                                                                                                                                                                                                                                                                                                                                                                                                                                                                                                                                                                                                                                                                                                                                                                                                                                                                                                                                                                                                                                                                                                                                                                                                                                                                                                           |            |                                                                                                                                                                                                                                                                                                                                                                                                                                                                                                |

Table S4: Impact of neurodevelopmental syndrome variants on protein stability and interaction with CYCLIN E1.

|               | mCSM-Stability ( $\Delta\Delta G$ ) - previous structure | mCSM-Stability ( $\Delta\Delta G$ ) | Change in protein stability | Distance to interface (Å) | mCSM-PPI 1&2 ( $\Delta\Delta G$ ) | Change in PPI binding affinity | $\Delta$ Charge | $\Delta$ Volume | $\Delta$ Residue nature    |
|---------------|----------------------------------------------------------|-------------------------------------|-----------------------------|---------------------------|-----------------------------------|--------------------------------|-----------------|-----------------|----------------------------|
| p.(Thr416Ile) | -0.134                                                   | -0.179                              | Decrease                    | 15.1                      | -0.07                             | Decrease                       | 0               | 50.6            | Polar -> Hydrophobic       |
| p.(Thr416Ala) |                                                          | -0.788                              | Decrease                    | 15.1                      | -0.134                            | Decrease                       | 0               | -27.5           | Polar -> Hydrophobic       |
| p.(His420Leu) |                                                          | -0.823                              | Decrease                    | 12.4                      | -0.469                            | Decrease                       | Partial         | 13.5            | Partial charge -> Neutral  |
| p.(Gly423Arg) | -1.031                                                   | -0.985                              | Decrease                    | 7.8                       | -0.264                            | Decrease                       | 1               | 113.3           | Neutral -> Basic           |
| p.(Arg441Gly) | -1.258                                                   | -1.367                              | Decrease                    | 2.8                       | 0.179                             | Increase                       | -1              | -113.3          | Basic -> Neutral           |
| p.(Ser462Pro) |                                                          | 0.973                               | Increase                    | 2.6                       | -2.449                            | Decrease                       | 0               | 23.7            | Polar -> Hydrophobic       |
| p.(Arg465His) |                                                          | -1.834                              | Decrease                    | 5.1                       | 0.286                             | Increase                       | Partial         | -20.2           | Basic -> Partial charge    |
| p.(Arg479Gln) | -0.625                                                   | -1.346                              | Decrease                    | 3.1                       | 0.054                             | Increase                       | -1              | -29.6           | Basic -> Unchanged         |
| p.(Asp480Gly) | 0.327                                                    | 1.401                               | Increase                    | 4.5                       | -1.998                            | Decrease                       | 1               | -51             | Acidic -> Neutral          |
| p.(Arg505His) | -2.019                                                   | -2.032                              | Decrease                    | 5.4                       | -0.038                            | Neutral                        | Partial         | -20.2           | Basic -> Partial charge    |
| p.(Val544Gly) | -3.203                                                   | -3.16                               | Decrease                    | 9.1                       | -1.114                            | Decrease                       | 0               | -79.9           | Hydrophobic -> Hydrophobic |
| p.(His580Tyr) | -0.414                                                   | -0.422                              | Decrease                    | 9.1                       | 0.311                             | Increase                       | Partial         | 40.4            | Partial charge -> Aromatic |
| p.(Ser582Ala) |                                                          | 0.033                               | Increase                    | 3.54                      | -0.422                            | Decrease                       | 0               | -0.4            | Polar -> Hydrophobic       |
| p.(Ala599Val) | -0.451                                                   | -0.093                              | Neutral                     | 4                         | 0.265                             | Increase                       | 0               | 51.4            | Hydrophobic -> Hydrophobic |
| p.(Ala626Val) |                                                          | -0.106                              | Decrease                    | 4.4                       | 0.291                             | Increase                       | 0               | 51.4            | Hydrophobic -> Hydrophobic |
| p.(Ser640Arg) | -0.639                                                   | -0.586                              | Decrease                    | 11.1                      | -0.355                            | Decrease                       | 1               | 84.4            | Polar -> Basic             |
| p.(Ile608Val) |                                                          | -2.019                              | Decrease                    | 22.3                      | -0.244                            | Decrease                       | 0               | -33.4           | Hydrophobic -> Hydrophobic |
| p.(Arg674Pro) | -0.648                                                   | -0.614                              | Decrease                    | 8.1                       | -0.321                            | Decrease                       | -1              | -60.7           | Basic -> Neutral           |
| p.(Arg674Trp) | -0.283                                                   | -0.157                              | Decrease                    | 8.1                       | 0.013                             | Neutral                        | -1              | 54.4            | Basic -> Aromatic          |
| p.(Arg689Gln) | -0.079                                                   | -0.353                              | Decrease                    | 3.4                       | -0.54                             | Decrease                       | -1              | -29.6           | Basic -> Neutral           |
| p.(Arg689Trp) |                                                          | -0.357                              | Decrease                    | 3.4                       | -0.437                            | Decrease                       | -1              | 54.4            | Basic -> Aromatic          |

mutation Cutoff Scanning Matrix (mCSM); Protein-protein interactions (PPI)

Table S5: Comparison of the impact of neurodevelopmental syndrome variants and gnomAD variants on protein stability and substrate binding

| Variant | Amino acid reference | Amino acid position | Amino acid change | mCSM-Stability ( $\Delta\Delta G$ ) | Distance to interface (Å) | mCSM-PPI 1&2 ( $\Delta\Delta G$ ) | Allele Count | Class  | Chromosome | Position  | rsID         | Reference | Alternate | Source                       | Protein Consequence | Transcript Consequence |
|---------|----------------------|---------------------|-------------------|-------------------------------------|---------------------------|-----------------------------------|--------------|--------|------------|-----------|--------------|-----------|-----------|------------------------------|---------------------|------------------------|
| T416A   | T                    | 416                 | A                 | -0.788                              | 15.1                      | -0.134                            | 1            | clin   | 4          | 153247315 | -            | G         | A         | This study                   | p.(Thr416Ile)       | c.1247C>T              |
| T416I   | T                    | 416                 | I                 | -0.179                              | 15.1                      | -0.07                             | 1            | clin   | 4          | 153249532 | -            | T         | C         | This study                   | p.(Thr416Ala)       | c.1246A>G              |
| H420L   | H                    | 420                 | L                 | -0.823                              | 12.4                      | -0.469                            | 1            | clin   | 4          | 153249519 | -            | T         | A         | This study                   | p.(His420Leu)       | c.1259 A>T             |
| G423R   | G                    | 423                 | R                 | -0.985                              | 7.8                       | -0.264                            | 2            | clin   | 4          | 153249511 | -            | C         | T         | This study                   | p.(Gly423Arg)       | c.1267G>A              |
| R441G   | R                    | 441                 | G                 | -1.367                              | 2.8                       | 0.179                             | 1            | clin   | 4          | 153249457 | -            | G         | C         | This study                   | p.(Arg441Gly)       | c.1321C>G              |
| S462P   | S                    | 462                 | P                 | 0.973                               | 2.6                       | -2.449                            | 1            | clin   | 4          | 153249394 | -            | A         | G         | This study                   | p.(Ser462Pro)       | c.1384T>C              |
| R465H   | R                    | 465*                | H                 | -1.834                              | 5.1                       | 0.286                             | 1            | clin   | 4          | 153249384 | -            | C         | T         | This study                   | p.(Arg465His)       | c.1394G>A              |
| R479Q   | R                    | 479*                | Q                 | -1.346                              | 3.1                       | 0.054                             | 1            | clin   | 4          | 153247366 | -            | C         | T         | This study                   | p.(Arg479Gln)       | c.1436G>A              |
| D480G   | D                    | 480                 | G                 | 1.401                               | 4.5                       | -1.998                            | 1            | clin   | 4          | 153247363 | -            | T         | C         | This study                   | p.(Asp480Gly)       | c.1439A>G              |
| R505H   | R                    | 505                 | H                 | -2.032                              | 5.4                       | -0.038                            | 1            | clin   | 4          | 153247288 | -            | C         | T         | This study                   | p.(Arg505His)       | c.1514G>A              |
| V544G   | V                    | 544                 | G                 | -3.16                               | 9.1                       | -1.114                            | 1            | clin   | 4          | 153247171 | -            | A         | C         | This study                   | p.(Val544Gly)       | c.1631T>G              |
| H580Y   | H                    | 580                 | Y                 | -0.422                              | 9.1                       | 0.311                             | 1            | clin   | 4          | 153245453 | -            | G         | A         | This study                   | p.(His580Tyr)       | c.1738C>T              |
| A599V   | A                    | 599*                | V                 | -0.093                              | 4                         | 0.265                             | 1            | clin   | 4          | 153245395 | -            | G         | A         | This study                   | p.(Ala599Val)       | c.1796C>T              |
| I608V   | I                    | 608                 | V                 | -2.019                              | 22.3                      | -0.244                            | 1            | clin   | 4          | 153245369 | -            | T         | C         | This study                   | p.(Ile608Val)       | c.1822A>G              |
| S640R   | S                    | 640                 | R                 | -0.586                              | 11.1                      | -0.355                            | 1            | clin   | 4          | 153244237 | -            | G         | T         | This study                   | p.(Ser640Arg)       | c.1920C>A              |
| R674P   | R                    | 674                 | P                 | -0.614                              | 8.1                       | -0.321                            | 1            | clin   | 4          | 153244136 | -            | C         | G         | This study                   | p.(Arg674Pro)       | c.2021G>C              |
| R674W   | R                    | 674                 | W                 | -0.157                              | 8.1                       | 0.013                             | 1            | clin   | 4          | 153244137 | -            | G         | A         | This study                   | p.(Arg674Trp)       | c.2020C>T              |
| R689Q   | R                    | 689                 | Q                 | -0.353                              | 3.4                       | -0.54                             | 1            | clin   | 4          | 153244091 | -            | C         | T         | This study                   | p.(Arg689Gln)       | c.2066G>A              |
| R689W   | R                    | 689                 | W                 | -0.357                              | 3.4                       | -0.437                            | 2            | clin   | 4          | 153244092 | -            | G         | A         | This study                   | p.(Arg689Trp)       | c.2065C>T              |
| V265I   | V                    | 265                 | I                 | -1.029                              | 57.368                    | 0.119                             | 1            | gnomad | 4          | 153259022 | rs1393933844 | C         | T         | gnomAD Genomes               | p.Val265Ile         | c.793G>A               |
| H267R   | H                    | 267                 | R                 | -0.581                              | 61.633                    | -0.111                            | 1            | gnomad | 4          | 153259015 | rs1172754641 | T         | C         | gnomAD Exomes                | p.His267Arg         | c.800A>G               |
| V271M   | V                    | 271                 | M                 | -0.254                              | 64.686                    | -0.311                            | 1            | gnomad | 4          | 153259004 | rs764074483  | C         | T         | gnomAD Exomes                | p.Val271Met         | c.811G>A               |
| K286E   | K                    | 286                 | E                 | -0.462                              | 60.444                    | -0.046                            | 1            | gnomad | 4          | 153258959 | rs1490325931 | T         | C         | gnomAD Exomes                | p.Lys286Glu         | c.856A>G               |
| L288F   | L                    | 288                 | F                 | -0.908                              | 59.843                    | 0.132                             | 6            | gnomad | 4          | 153258869 | -            | C         | A         | gnomAD Exomes                | p.Leu288Phe         | c.864G>T               |
| A289S   | A                    | 289                 | S                 | -1.765                              | 57.647                    | 0.121                             | 6            | gnomad | 4          | 153258868 | rs1444335835 | C         | A         | gnomAD Exomes                | p.Ala289Ser         | c.865G>T               |
| Y291C   | Y                    | 291                 | C                 | -0.467                              | 55.112                    | -0.254                            | 2            | gnomad | 4          | 153258861 | rs948405432  | T         | C         | gnomAD Exomes                | p.Tyr291Cys         | c.872A>G               |
| Y291N   | Y                    | 291                 | N                 | -0.601                              | 55.112                    | -0.017                            | 2            | gnomad | 4          | 153258862 | rs369187069  | A         | T         | gnomAD Exomes                | p.Tyr291Asn         | c.871T>A               |
| K299E   | K                    | 299                 | E                 | 0.02                                | 40.936                    | 0.004                             | 1            | gnomad | 4          | 153258838 | rs750051282  | T         | C         | gnomAD Exomes                | p.Lys299Glu         | c.895A>G               |
| L302I   | L                    | 302                 | I                 | -0.922                              | 44.101                    | -0.084                            | 1            | gnomad | 4          | 153258829 | rs150506693  | G         | T         | gnomAD Exomes                | p.Leu302Ile         | c.904C>A               |
| T307I   | T                    | 307                 | I                 | -0.413                              | 54.949                    | -0.006                            | 1            | gnomad | 4          | 153258813 | rs764174613  | G         | A         | gnomAD Exomes                | p.Thr307Ile         | c.920C>T               |
| R309H   | R                    | 309                 | H                 | -0.992                              | 59.667                    | 0.003                             | 1            | gnomad | 4          | 153258807 | rs760675122  | C         | T         | gnomAD Exomes                | p.Arg309His         | c.926G>A               |
| L319I   | L                    | 319                 | I                 | -0.533                              | 49.037                    | -0.066                            | 1            | gnomad | 4          | 153258778 | rs1369661240 | G         | T         | gnomAD Genomes               | p.Leu319Ile         | c.955C>A               |
| K326R   | K                    | 326                 | R                 | -0.425                              | 39.317                    | 0.12                              | 1            | gnomad | 4          | 153258756 | rs773325030  | T         | C         | gnomAD Exomes                | p.Lys326Arg         | c.977A>G               |
| K326T   | K                    | 326                 | T                 | -0.52                               | 39.317                    | -0.056                            | 1            | gnomad | 4          | 153258756 | rs773325030  | T         | G         | gnomAD Exomes                | p.Lys326Thr         | c.977A>C               |
| E327D   | E                    | 327                 | D                 | -0.513                              | 37.333                    | 0.1                               | 1            | gnomad | 4          | 153258752 | rs148769501  | T         | G         | gnomAD Exomes                | p.Glu327Asp         | c.981A>C               |
| G329E   | G                    | 329                 | E                 | -1.067                              | 34.737                    | 0.145                             | 1            | gnomad | 4          | 153258720 | rs1358178925 | C         | T         | gnomAD Genomes               | p.Gly329Glu         | c.986G>A               |
| I330V   | I                    | 330                 | V                 | -1.265                              | 36.875                    | -0.056                            | 1            | gnomad | 4          | 153258718 | rs767438108  | T         | C         | gnomAD Exomes                | p.Ile330Val         | c.988A>G               |
| I336M   | I                    | 336                 | M                 | -0.569                              | 45.102                    | 0.19                              | 1            | gnomad | 4          | 153251998 | rs1046708929 | G         | C         | gnomAD Exomes                | p.Ile336Met         | c.1008C>G              |
| K337Q   | K                    | 337                 | Q                 | -0.295                              | 47.538                    | 0.194                             | 1            | gnomad | 4          | 153251997 | rs750480880  | T         | G         | gnomAD Exomes                | p.Lys337Gln         | c.1009A>C              |
| R338K   | R                    | 338                 | K                 | -0.216                              | 50.737                    | 0.251                             | 3            | gnomad | 4          | 153251993 | rs1185005670 | C         | T         | gnomAD Exomes                | p.Arg338Lys         | c.1013G>A              |
| V341A   | V                    | 341                 | A                 | -0.617                              | 55.273                    | -0.144                            | 1            | gnomad | 4          | 153251984 | rs1485389861 | A         | G         | gnomAD Exomes                | p.Val341Ala         | c.1022T>C              |
| I342T   | I                    | 342                 | T                 | -0.67                               | 57.24                     | -0.602                            | 2            | gnomad | 4          | 153251981 | rs765495879  | A         | G         | gnomAD Exomes                | p.Ile342Thr         | c.1025T>G              |
| I342V   | I                    | 342                 | V                 | -0.424                              | 57.24                     | 0.344                             | 1            | gnomad | 4          | 153251982 | rs1247097813 | T         | C         | gnomAD Exomes                | p.Ile342Val         | c.1024A>G              |
| I347V   | I                    | 347                 | V                 | -0.956                              | 53.902                    | -0.016                            | 1            | gnomad | 4          | 153251967 | rs762013076  | T         | C         | gnomAD Exomes                | p.Ile347Val         | c.1039A>G              |
| H359R   | H                    | 359                 | R                 | -0.889                              | 35.47                     | 0.035                             | 1            | gnomad | 4          | 153251930 | rs1014611334 | T         | C         | gnomAD Genomes               | p.His359Arg         | c.1076A>G              |
| T363N   | T                    | 363                 | N                 | -1.29                               | 31.186                    | -0.004                            | 3            | gnomad | 4          | 153251918 | rs1381320045 | G         | T         | gnomAD Exomes                | p.Thr363Asn         | c.1088C>A              |
| N364S   | N                    | 364                 | S                 | -1.14                               | 29.412                    | -0.243                            | 2            | gnomad | 4          | 153251915 | rs775885576  | T         | C         | gnomAD Exomes                | p.Asn364Ser         | c.1091A>G              |
| R367Q   | R                    | 367                 | Q                 | -0.102                              | 29.26                     | -0.019                            | 7            | gnomad | 4          | 153251906 | rs745418631  | C         | T         | gnomAD Exomes,gnomAD Genomes | p.Arg367Gln         | c.1100G>A              |
| K371R   | K                    | 371                 | R                 | -0.371                              | 27.686                    | 0.115                             | 1            | gnomad | 4          | 153251894 | rs761747465  | T         | C         | gnomAD Exomes                | p.Lys371Arg         | c.1112A>G              |
| P373R   | P                    | 373                 | R                 | -0.297                              | 23.003                    | -0.033                            | 1            | gnomad | 4          | 153251888 | rs748952220  | G         | C         | gnomAD Exomes                | p.Pro373Arg         | c.1118C>G              |
| K374E   | K                    | 374                 | E                 | 0.473                               | 21.263                    | -0.168                            | 1            | gnomad | 4          | 153251886 | rs937391131  | T         | C         | gnomAD Exomes                | p.Lys374Glu         | c.1120A>G              |
| L387V   | L                    | 387                 | V                 | -1.645                              | 13.766                    | 0.063                             | 1            | gnomad | 4          | 153250901 | rs1338105130 | A         | C         | gnomAD Exomes                | p.Leu387Val         | c.1159T>G              |
| S407L   | S                    | 407                 | L                 | -0.153                              | 23.243                    | -0.1                              | 1            | gnomad | 4          | 153250840 | -            | G         | A         | gnomAD Genomes               | p.Ser407Leu         | c.1220C>G              |
| V418L   | V                    | 418                 | L                 | -0.209                              | 15.903                    | -0.155                            | 2            | gnomad | 4          | 153249526 | rs755422880  | C         | A         | gnomAD Exomes                | p.Val418Leu         | c.1252G>T              |
| V418M   | V                    | 418                 | M                 | -0.517                              | 15.903                    | -0.098                            | 2            | gnomad | 4          | 153249526 | rs755422880  | C         | T         | gnomAD Exomes                | p.Val418Met         | c.1252G>A              |
| N432I   | N                    | 432                 | I                 | 0.078                               | 26.504                    | -0.075                            | 2            | gnomad | 4          | 153249483 | rs772668762  | T         | A         | gnomAD Exomes                | p.Asn432Ile         | c.1295A>T              |
| I433F   | I                    | 433                 | F                 | -1.662                              | 23.411                    | 0.361                             | 3            | gnomad | 4          | 153249481 | rs761173677  | T         | A         | gnomAD Exomes                | p.Ile433Phe         | c.1297A>T              |
| I433V   | I                    | 433                 | V                 | -1.665                              | 23.411                    | -0.172                            | 2            | gnomad | 4          | 153249481 | rs761173677  | T         | C         | gnomAD Exomes                | p.Ile433Val         | c.1297A>G              |
| I435V   | I                    | 435                 | V                 | -1.87                               | 16.772                    | -0.377                            | 1            | gnomad | 4          | 153249475 | rs1190126709 | T         | C         | gnomAD Exomes                | p.Ile435Val         | c.1303A>G              |
| V445L   | V                    | 445                 | L                 | -0.729                              | 18.426                    | -0.093                            | 1            | gnomad | 4          | 153249445 | rs776371212  | C         | A         | gnomAD Exomes                | p.Val445Leu         | c.1333G>T              |
| T456N   | T                    | 456                 | N                 | -0.895                              | 14.647                    | -0.131                            | 1            | gnomad | 4          | 153249411 | rs775244232  | G         | T         | gnomAD Exomes                | p.Thr456Asn         | c.1367C>A              |
| L457F   | L                    | 457                 | F                 | -1.16                               | 12.355                    | 0.603                             | 1            | gnomad | 4          | 153249407 | rs1433184454 | T         | A         | gnomAD Exomes                | p.Leu457Phe         | c.1371A>T              |
| G459V   | G                    | 459                 | V                 | -0.347                              | 9.584                     | -0.311                            | 1            | gnomad | 4          | 153249402 | rs772056210  | C         | A         | gnomAD Exomes                | p.Gly459Val         | c.1376G>A              |
| R465C   | R                    | 465*                | C                 | -1.48                               | 5.148                     | 0.035                             | 1            | gnomad | 4          | 153249385 | rs867384286  | G         | A         | gnomAD Exomes                | p.Arg465Cys         | c.1393C>T              |
| E471G   | E                    | 471                 | G                 | -0.856                              | 25.356                    | -0.243                            | 12           | gnomad | 4          | 153249366 | rs756238684  | T         | C         | gnomAD Exomes                | p.Glu471Gly         | c.1412A>G              |
| R479G   | R                    | 479*                | G                 | -0.614                              | 3.072                     | -1.265                            | 1            | gnomad | 4          | 153247367 | rs747241612  | G         | C         | gnomAD Exomes                | p.Arg479Gly         | c.1435C>G              |
| V485I   | V                    | 485                 | I                 | -1.163                              | 17.029                    | -0.053                            | 2            | gnomad | 4          | 153247349 | rs1325363774 | C         | T         | gnomAD Exomes                | p.Val485Ile         | c.1453G>A              |
| I488T   | I                    | 488                 | T                 | -2.861                              | 20.45                     | -0.025                            | 1            | gnomad | 4          | 153247339 | rs1222797439 | A         | G         | gnomAD Exomes                | p.Ile488Thr         | c.1463T>C              |
| H495R   | H                    | 495                 | R                 | -1.47                               | 17.376                    | 0.073                             | 3            | gnomad | 4          | 153247318 | rs750717620  | T         | C         | gnomAD Exomes                | p.His495Arg         | c.1484A>G              |
| Y509C   | Y                    | 509                 | C                 | -2.06                               | 19.683                    | -0.627                            | 2            | gnomad | 4          | 153247276 | rs1334352027 | T         | C         | gnomAD Exomes                | p.Tyr509Cys         | c.1526A>G              |
| V515I   | V                    | 515                 | I                 | -0.697                              | 16.152                    | -0.323                            | 1            | gnomad | 4          | 153247259 | rs757683191  | C         | T         | gnomAD Exomes                | p.Val515Ile         | c.1543G>A              |
| T532I   | T                    | 532                 | I                 | -0.371                              | 20.341                    | -0.005                            | 1            | gnomad | 4          | 153247207 | rs1179476070 | G         | A         | gnomAD Exomes                | p.Thr532Ile         | c.1595C>T              |
| T541S   | T                    | 541                 | S                 | -0.708                              | 6.634                     | 0.083                             | 1            | gnomad | 4          | 153247181 | rs1184403966 | T         | A         | gnomAD Exomes                | p.Thr541Ser         | c.1621A>T              |
| N542S   | N                    | 542                 | S                 | -1.271                              | 3.775                     | -0.02                             | 1            | gnomad | 4          | 153247177 | rs1462861861 | T         | C         | gnomAD Exomes                | p.Asn542Ser         | c.1625A>G              |
| R564C   | R                    | 564                 | C                 | -1.983                              | 15.026                    | -0.448                            | 1            | gnomad | 4          | 153245501 | rs1024060344 | G         | A         | gnomAD Genomes               | p.Arg564Cys         | c.1690C>T              |
| T576M   | T                    | 576                 | M                 | 0.072                               | 16.356                    | -0.047                            | 2            | gnomad | 4          | 153245464 | rs1429385222 | G         | A         | gnomAD Exomes                | p.Thr576Met         | c.1727C>T              |
| M587I   | M                    | 587                 | I                 | -0.303                              | 12.55                     | -0.345                            | 1            | gnomad | 4          | 153245430 | rs1269436440 | C         | T         | gnomAD Exomes                | p.Met587Ile         | c.1761G>A              |
| E588D   | E                    | 588                 | D                 | -1.234                              | 15.447                    | 0.029                             | 2            | gnomad | 4          | 153245427 | rs751435265  | T         | A         | gnomAD Exomes                | p.Glu588Asp         | c.1764A>T              |
| K590E   | K                    | 590                 | E                 | 0.269                               | 22.181                    | -0.234                            | 1            | gnomad | 4          | 153245423 | -            | T         | C         | gnomAD Exomes                | p.Lys590Glu         | c.1768A>G              |
| K590R   | K                    | 590                 | R                 | -0.309                              | 22.181                    | -0.109                            | 1            | gnomad | 4          | 153245422 | rs1290448722 | T         | C         |                              |                     |                        |
